# Supplementary material
Source: PubMed Central journal article supplement (PMC5206901)
Supplement: NIHMS836653-supplement-Supplementary_materials.pdf [file NIHMS836653-supplement-Supplementary_materials.pdf]

Supplementary Table 1: Bivariate correlation between measures of arterial structure and function

|                  | PWV | AIx@75  | CCA<br>IMT | CCA<br>Diameter | CCA<br>W/L ratio | ESP     | CCA<br>circ. stress | CCA<br>Strain | Office PP |
|------------------|-----|---------|------------|-----------------|------------------|---------|---------------------|---------------|-----------|
| PWV              | --- | 0.391 & | 0.421 &    | 0.276 &         | 0.279 &          | 0.483 & | 0.424 &             | -0.148 &      | 0.300 &   |
| AIx@75           |     | ---     | 0.393 &    | 0.101 §         | 0.376 &          | 0.507 & | 0.439 &             | -0.154 &      | 0.221 &   |
| CCA IMT          |     |         | ---        | 0.418 &         | 0.795 &          | 0.450 & | 0.816 &             | -0.135 &      | 0.397 &   |
| CCA Diameter     |     |         |            | ---             | -0.186 &         | 0.402 & | 0.055 *             | -0.330 &      | 0.365 &   |
| CCA W/L ratio    |     |         |            |                 | ---              | 0.215 & | 0.863 &             | 0.067 **      | 0.179 &   |
| ESP              |     |         |            |                 |                  | ---     | 0.621 &             | -0.154 &      | 0.610 &   |
| CCA circ .stress |     |         |            |                 |                  |         | ---                 | -0.026        | 0.367 &   |
| CCA strain       |     |         |            |                 |                  |         |                     | ---           | -0.027    |

\*p< 0.05      \*\*p< 0.01      § p>0.001      & p<0.0001



Supplementary Table 2B: Office, central, and ABPM blood pressures and medication use in subjects not assuming antihypertensive therapy according to their office and 24hABPM BP profile (defined by 24h BP values 130/80 mmHg).

|                                                                      | True NT<br>(n= 1721)<br>(group 0) | WCHT<br>(n= 187)<br>(group 1) | MH<br>(n= 147)<br>(group 2) | True HT<br>(n=907)<br>(group 3) | ANOV<br>A<br>P value | Post-hoc<br>Bonferroni<br>(p<0.05) | ANC<br>OVA<br>P<br>value<br>* |
|----------------------------------------------------------------------|-----------------------------------|-------------------------------|-----------------------------|---------------------------------|----------------------|------------------------------------|-------------------------------|
| Office SBP (mmHg)                                                    | 116.2 ± 11.0                      | 146.0 ± 11.                   | 129.7 ± 8.8                 | 136.3 ± 18.2                    | .0001                | 1 > 3 > 2 > 0                      | .0001                         |
| Office DBP (mmHg)                                                    | 73.0 ± 7.2                        | 87.7 ± 7.2                    | 76.0 ± 6.8                  | 84.2 ± 10.1                     | .0001                | 1 > 3 > 2 > 0                      | .0001                         |
| Office MBP (mmHg)                                                    | 87.2 ± 7.7                        | 106.9 ± 6.0                   | 93.7 ± 6.3                  | 101.4 ± 11.6                    | .0001                | 1 > 3 > 2 > 0                      | .0001                         |
| Office PP (mmHg)                                                     | 43.2 ± 8.3                        | 58.3 ± 13.4                   | 53.7 ± 8.7                  | 52.1 ± 14.0                     | .0001                | 1 > 2,3 > 0                        | .0001                         |
| HR (bpm)                                                             | 68.5 ± 10.8                       | 68.4 ± 11.2                   | 68.0 ± 8.6                  | 69.9 ± 11.3                     | .01                  |                                    |                               |
| 24h SBP (mmHg)                                                       | 113.6 ± 7.1                       | 120.3 ± 6.3                   | 133.9 ± 4.6                 | 132.0 ± 9.9                     | .0001                | 2,3 > 1 > 0                        | .0001                         |
| 24h DBP (mmHg)                                                       | 71.0 ± 5.1                        | 72.9 ± 4.9                    | 75.3 ± 4.6                  | 84.3 ± 5.9                      | .0001                | 2,3 > 1 > 0                        | .0001                         |
| Central SBP (mmHg)                                                   | 113.1 ± 12.20                     | 132.3 ± 12.4                  | 117.0 ± 10.8                | 124.2 ± 18.7                    | .0001                | 1 > 3 > 2 > 0                      | .0001                         |
| Central ESP (mmHg)                                                   | 94.7 ± 11.0                       | 119.8 ± 10.2                  | 105.7 ± 9.9                 | 113.7 ± 16.1                    | .0001                | 1 > 3 > 2 > 0                      | .0001                         |
| Antidiabetic drugs (%)                                               | 2.1                               | 5.4                           | 9.5                         | 3.0                             | .0001                | 1,2 > 0                            | 0.19                          |
| Antiplatelet (%)                                                     | 2.7                               | 7.9                           | 11.1                        | 5.4                             | .0001                |                                    | 0.13                          |
| Statin (%)                                                           | 2.7                               | 6.1                           | 6.4                         | 4.7                             | .0001                |                                    | 0.44                          |
| Nitrates (%)                                                         | 0.6                               | 0.7                           | 3.2                         | 0.8                             | 0.29                 |                                    | 0.11                          |
| *after controlling for age, sex, BMI, smoking, and diabetes mellitus |                                   |                               |                             |                                 |                      |                                    |                               |

Supplementary Table 2C: Arterial properties in subjects not assuming antihypertensive therapy according to their office and 24hABPM BP profile (defined by 24h BP values 130/80 mmHg).

|                                                                      | True NT<br>(n= 1877)<br>(group 0) | WCHT<br>(n= 279)<br>(group 1) | MH<br>(n= 63)<br>(group 2) | True HT<br>(n=743)<br>(group 3) | ANOVA<br>P value | Post-hoc<br>Bonferroni<br>(p<0.05) | ANCOVA<br>P value<br>* |
|----------------------------------------------------------------------|-----------------------------------|-------------------------------|----------------------------|---------------------------------|------------------|------------------------------------|------------------------|
| PWV (m/sec)                                                          | 6.4 ± 1.7                         | 8.2 ± 2.1                     | 8.6 ± 3.9                  | 7.9 ± 2.8                       | .0001            | 0 < all                            | .0001                  |
| PWV/MBP                                                              | 7.4 ± 1.9                         | 7.7 ± 2.0                     | 8.5 ± 2.8                  | 7.8 ± 2.4                       | .0001            | 2,3 > 0                            | .02                    |
| AI @75 (%)                                                           | 18.6 ± 14.4                       | 28.1 ± 11.9                   | 26.1 ± 13.6                | 25.5 ± 11.9                     | .0001            | 0 < all                            | .0001                  |
| CCA IMT (mm)                                                         | 0.53 ± 0.11                       | 0.63 ± 0.15                   | 0.67 ± 0.16                | 0.59 ± 0.14                     | .0001            | 1,2 > 3 > 0                        | .0001                  |
| CCA diameter<br>(mm)                                                 | 5.2 ± 0.6                         | 5.8 ± 0.7                     | 5.7 ± 0.8                  | 5.7 ± 0.8                       | .0001            | 0 < all                            | .0001                  |
| CCA W/L ratio                                                        | 20.6 ± 3.8                        | 21.7 ± 5.1                    | 23.6 ± 5.9                 | 21.3 ± 4.6                      | .0001            | 0 < all                            | 0.48                   |
| CCA CSA                                                              | 19.7 ± 5.7                        | 25.8 ± 8.2                    | 26.7 ± 10.4                | 24.4 ± 8.1                      | .0001            | 0 < all                            | .0001                  |
| CCA<br>circumferential<br>stress                                     | 17.9 ± 3.9                        | 23.3 ± 5.8                    | 21.8 ± 5.4                 | 21.7 ± 5.4                      | .0001            | 1 > 2,3 > 0                        | .0001                  |
| CCA strain (%)                                                       | 8.7 ± 3.1                         | 8.2 ± 3.5                     | 8.4 ± 3.3                  | 7.7 ± 3.2                       | .0001            | 3 < 0                              | .05                    |
| CCA stiffness                                                        | 6.2 ± 3.4                         | 7.8 ± 5.0                     | 7.4 ± 3.5                  | 7.6 ± 4.8                       | .0001            | 1,3 > 0                            | 0.10                   |
| *after controlling for age, sex, BMI, smoking, and diabetes mellitus |                                   |                               |                            |                                 |                  |                                    |                        |

Supplementary Table 3A: Demographic and arterial profiles of subjects – including those assuming antihypertensive medications - according to their office and 24hABPM BP profile.

|                            | True NT<br>(n= 1857) | WCHT<br>(n= 257 ) | MH<br>(n= 175 ) | True HT<br>(n= 1121) | ANOVA<br>P value | ANCOVA<br>P value * |
|----------------------------|----------------------|-------------------|-----------------|----------------------|------------------|---------------------|
| Age (years)                | 46.5 ± 14.8          | 60.9 ± 12.2       | 58.1 ± 18.0     | 56.1 ± 14.4          | 0.0001           |                     |
| Women (%)                  |                      |                   |                 |                      |                  |                     |
| Diabetes mellitus (%)      | 4.4                  | 14.0              | 18.3            | 13.0                 | 0.0001           |                     |
|                            |                      |                   |                 |                      |                  |                     |
| Office SBP (mmHg)          | 116.2±11.0           | 146.1±11.3        | 126.4±9.7       | 138.7±18.5           | 0.0001           | 0.0001              |
| Office DBP (mmHg)          | 73.0 ± 7.2           | 88.1 ± 8.2        | 74.8 ± 6.3      | 84.3 ± 9.8           | 0.0001           | 0.0001              |
| Office MBP (mmHg)          | 87.2 ± 7.7           | 107.2 ± 6.6       | 91.8 ± 6.4      | 102.3±11.3           | 0.0001           | 0.0001              |
| Office PP (mmHg)           | 43.3 ± 8.4           | 58.0 ± 14.0       | 51.6 ± 8.9      | 54.4 ± 15.0          | 0.0001           | 0.0001              |
| HR (bpm)                   | 68.3 ± 11.0          | 68.9 ± 11.2       | 66.4 ± 9.8      | 69.3 ± 11.3          | 0.01             | 0.0001              |
| 24h SBP (mmHg)             | 112.7±6.4            | 117.3±5.3         | 129.6±4.0       | 131.4±9.9            | 0.0001           | 0.0001              |
| 24h DBP (mmHg)             | 70.3 ± 5.0           | 71.3 ± 5.3        | 74.2 ± 4.1      | 82.2 ± 6.8           | 0.0001           | 0.0001              |
| Central SBP (mmHg)         | 103.5±12.1           | 132.4±12.4        | 113.8±11.6      | 126.4±18.6           | 0.0001           | 0.0001              |
| Central ESP (mmHg)         | 94.8 ± 11.1          | 119.8±10.3        | 102.9±10.7      | 115.2±15.7           | 0.0001           | 0.0001              |
|                            |                      |                   |                 |                      |                  |                     |
| PWV (m/sec)                | 6.5 ± 1.8            | 8.2 ± 2.1         | 8.2 ± 3.2       | 8.3 ± 3.0            | 0.0001           | 0.0001              |
| PWV/MBP                    | 7.5 ± 1.9            | 7.6 ± 2.0         | 8.7 ± 2.9       | 8.1 ± 2.6            | 0.001            | 0.0001              |
| AI @75 (%)                 | 19.3 ± 14.2          | 28.8 ± 11.4       | 22.5 ± 16.2     | 26.1 ± 11.8          | 0.0001           | 0.0001              |
| CCA IMT (mm)               | 0.54 ± 0.11          | 0.63 ± 0.14       | 0.64 ± 0.16     | 0.61 ± 0.14          | 0.0001           | 0.0001              |
| CCA diameter (mm)          | 5.2 ± 0.6            | 5.8 ± 0.7         | 5.7 ± 0.9       | 5.7 ± 0.8            | 0.0001           | 0.0001              |
| CCA W/L ratio              | 20.7 ± 3.8           | 21.6 ± 5.2        | 23.2 ± 5.5      | 21.7 ± 5.8           | 0.07             | 0.24                |
| CCA CSA                    | 19.8 ± 5.7           | 25.3 ± 7.2        | 26.6 ± 10.0     | 25.4 ± 8.8           | 0.0001           | 0.0001              |
| CCA circumferential stress | 18.0 ± 4.1           | 23.3 ± 5.7        | 21.3 ± 5.4      | 22.2 ± 5.8           | 0.0001           | 0.0001              |
| CCA strain (%)             | 8.7 ± 3.2            | 8.2 ± 3.3         | 8.9 ± 3.4       | 7.8 ± 3.2            | 0.55             | 0.01                |
| CCA stiffness              | 6.3 ± 3.8            | 7.6 ± 4.6         | 6.9 ± 3.6       | 7.8 ± 4.8            | 0.0001           | 0.06                |

\*after controlling for age, sex, BMI, smoking, and diabetes mellitus

Supplementary Table 3B: Metabolic and medication use of subjects – including those assuming antihypertensive medications - according to their office and 24hABPM BP profile.

|                                   | True NT<br>(n= 1857) | WCHT<br>(n= 257 ) | MH<br>(n= 175 ) | True HT<br>(n= 1121) | ANOVA<br>P value | ANCOVA<br>P value * |
|-----------------------------------|----------------------|-------------------|-----------------|----------------------|------------------|---------------------|
| Age (years)                       | 46.5 ± 14.8          | 60.9 ± 12.2       | 58.1 ± 18.0     | 56.1 ± 14.4          | 0.0001           |                     |
| Diabetes mellitus (%)             | 4.4                  | 14.0              | 18.3            | 13.0                 | 0.0001           |                     |
|                                   |                      |                   |                 |                      |                  |                     |
| BMI (Kg/m <sup>2</sup> )          | 24.8 ± 4.3           | 29.3 ± 4.9        | 27.0 ± 4.5      | 27.4 ± 4.6           | 0.0001           |                     |
| Waist circumference<br>(cm)       | 83.8 ± 11.5          | 94.5 ± 12.1       | 90.3 ± 11.2     | 91.4 ± 12.2          | 0.0001           | 0.88                |
| Fasting glucose (mg/dl)           | 94.2 ± 19.5          | 104.1±24.4        | 107.0±34.6      | 104.9±28.4           | 0.0001           | 0.05                |
| Total cholesterol(mg/dl)          | 214.2±39.3           | 226.2±38.9        | 213.9±43.6      | 222.6±38.9           | 0.0001           | 0.0001              |
| LDL cholesterol (mg/dl)           | 135.3±34.1           | 144.2±32.9        | 134.3±36.8      | 142.0±33.7           | 0.0001           | 0.01                |
| HDL cholesterol(mg/dl)            | 58.4 ± 14.6          | 56.9 ± 15.2       | 56.4 ± 16.8     | 55.2 ± 13.6          | 0.0001           | 0.10                |
| Triglycerides (mg/dl)             | 103.0±56.5           | 124.6±59.4        | 117.3±66.1      | 128.6±83.6           | 0.0001           | 0.0001              |
| Serum creatinine<br>(mg/ml)       | 0.85 ± 0.17          | 0.90 ± 0.18       | 0.88 ± 0.17     | 0.90 ± 0.18          | 0.0001           | 0.17                |
| Uric acid (mg/ml)                 | 4.2 ± 1.3            | 5.2 ± 1.5         | 4.9 ± 1.3       | 5.0 ± 1.5            | 0.0001           | 0.07                |
|                                   |                      |                   |                 |                      |                  |                     |
| Antihypertensive<br>medication(%) | 7.6                  | 27.2              | 16.0            | 19.2                 | 0.0001           | 0.05                |
| Antidiabetic<br>medications (%)   | 2.4                  | 6.2               | 9.7             | 4.8                  | 0.0001           | 0.05                |
| Antiplatelet (%)                  | 5.3                  | 16.3              | 14.3            | 9.6                  | 0.0001           | 0.07                |
| Statin (%)                        | 4.2                  | 11.7              | 11.4            | 7.9                  | 0.0001           | 0.45                |
| Nitrates (%)                      | 1.6                  | 1.6               | 3.4             | 2.2                  | 0.24             | 0.05                |
| Diuretics (%)                     | 3.8                  | 12.1              | 8.6             | 6.7                  | 0.0001           | 0.13                |
| Beta-blockers (%)                 | 3.2                  | 8.2               | 2.9             | 4.3                  | 0.01             | 0.05                |
| Calcium channel-<br>blockers (%)  | 1.1                  | 6.2               | 5.7             | 4.4                  | 0.0001           | 0.09                |
| CEI inhibitors (%)                | 2.1                  | 7.8               | 4.6             | 5.3                  | 0.0001           | 0.48                |
| AT1 blockers (%)                  | 3.5                  | 11.3              | 6.9             | 7.9                  | 0.0001           | 0.69                |
| Alpha blockers (%)                | 0.2                  | 0.4               | 1.1             | 1.2                  | 0.01             | 0.17                |

\*after controlling for age, sex, BMI, smoking and diabetes mellitus

Supplementary Table 4A: Demographic and metabolic profile of subjects not assuming antihypertensive medications according to their office and 24hABPM BP profile in men and women

|                           | MEN                |                 |               |                     | WOMEN                |                 |               |                    | ANCOVA analysis (p <) |                    |                  |
|---------------------------|--------------------|-----------------|---------------|---------------------|----------------------|-----------------|---------------|--------------------|-----------------------|--------------------|------------------|
|                           | True NT<br>(n=518) | WCHT<br>(n= 86) | MH<br>(n= 80) | True HT<br>(n= 499) | True NT<br>(n= 1203) | WCHT<br>(n=101) | MH<br>(n= 67) | True HT<br>(n=408) | Sex-effect            | BP category effect | Interaction term |
| Age (years)               | 45.6 ± 14.9        | 56.2 ± 13.7     | 51.4 ± 19.6   | 53.9 ± 13.5         | 44.5±13.6            | 61.0±11.0       | 59.8±14.5     | 53.1±14.8          | .0001                 | .0001              | .0001            |
| Diabetes mellitus (%)     | 5.2                | 10.5            | 15.0          | 11.0                | 2.8                  | 9.9             | 16.4          | 8.6                | 0.50                  | .0001              | 0.80             |
| BMI (Kg/m <sup>2</sup> )  | 25.6 ± 3.4         | 29.6 ± 4.2      | 26.5 ± 3.8    | 27.8 ± 3.5          | 23.9 ± 4.3           | 28.6 ± 4.8      | 27.1±5.4      | 25.7 ± 4.9         | .0001                 | .0001              | .01              |
| Waist circumference (cm)  | 89.8 ± 10.0        | 100.3±10.8      | 91.9 ± 9.8    | 95.5 ± 9.5          | 80.0±10.1            | 88.7 ± 9.8      | 86.8±12.0     | 83.9±11.7          | .0001                 | .0001              | .01              |
| Fasting glucose (mg/dl)   | 97.7 ± 17.3        | 105.1±24.7      | 106.3±26.4    | 105.7±27.7          | 91.2 ± 18.5          | 98.7 ± 18.6     | 103.5±33.4    | 98.3±23.8          | .0001                 | .0001              | 0.68             |
| Total cholesterol (mg/dl) | 211.0±37.6         | 226.3±38.4      | 205.4±45.8    | 224.5±40.9          | 215.8±39.3           | 233.6±36.6      | 227.2±38.7    | 224.0±37.6         | .0001                 | .0001              | .01              |
| LDL cholesterol (mg/dl)   | 136.3±33.1         | 147.9±29.9      | 132.1±39.7    | 145.8±35.0          | 135.2±34.0           | 149.3±31.0      | 140.9±33.8    | 141.7±32.5         | 0.53                  | .0001              | 0.17             |
| HDL cholesterol (mg/dl)   | 50.7 ± 12.1        | 51.1 ± 11.9     | 49.9 ± 12.8   | 51.3 ± 12.6         | 62.2±13.9            | 61.8 ± 14.6     | 63.4 ± 17.5   | 60.7 ± 12.3        | .0001                 | 0.86               | 0.15             |
| Triglycerides (mg/dl)     | 120.1±67.0         | 136.5±63.5      | 118.5±72.2    | 141.9±101.6         | 92.7±48.4            | 110.7±59.7      | 114.4±60.5    | 107.8±55.5         | .0001                 | .0001              | 0.09             |
| Serum creatinine (mg/ml)  | 0.95 ± 0.14        | 0.98 ± 0.18     | 0.93 ± 0.14   | 0.97 ± 0.16         | 0.79 ± 0.14          | 0.82 ± 0.15     | 0.80 ± 0.15   | 0.79 ± 0.14        | .0001                 | 0.06               | 0.14             |
| Uric acid (mg/ml)         | 5.3 ± 1.1          | 5.9 ± 1.2       | 5.5 ± 1.1     | 5.7 ± 1.2           | 3.7 ± 0.9            | 4.4 ± 1.1       | 4.1 ± 1.0     | 3.9 ± 1.1          | .0001                 | .0001              | 0.13             |

Supplementary Table 4B: Office, central, and ABPM blood pressures of subjects not assuming antihypertensive medications according to their office and 24hABPM BP profile in men and women

|                    | MEN                |                 |               |                     | WOMEN                |                 |               |                    | ANCOVA analysis (p <) |                    |                  |
|--------------------|--------------------|-----------------|---------------|---------------------|----------------------|-----------------|---------------|--------------------|-----------------------|--------------------|------------------|
|                    | True NT<br>(n=518) | WCHT<br>(n= 86) | MH<br>(n= 80) | True HT<br>(n= 499) | True NT<br>(n= 1203) | WCHT<br>(n=101) | MH<br>(n= 67) | True HT<br>(n=408) | Sex-effect            | BP category effect | Interaction term |
| Office SBP (mmHg)  | 120.0±9.6          | 144.3±12.1      | 126.0 ± 9.4   | 138.7 ± 16.7        | 113.6±10.8           | 145.6±9.8       | 127.3±8.7     | 133.8±18.9         | .01                   | .0001              | .0001            |
| Office DBP (mmHg)  | 75.2 ± 6.9         | 88.5 ± 7.1      | 75.3 ± 6.4    | 85.5 ± 9.5          | 71.6 ± 7.0           | 87.8 ± 7.4      | 75.0 ± 6.3    | 82.1 ± 9.8         | .0001                 | .0001              | .01              |
| Office MBP (mmHg)  | 90.0 ± 6.9         | 106.9±5.9       | 92.0 ± 6.3    | 103.1 ± 10.6        | 85.5 ± 7.6           | 106.9±5.7       | 92.3 ± 6.0    | 99.2 ± 11.8        | .0001                 | .0001              | .001             |
| Office PP (mmHg)   | 44.8 ± 8.2         | 55.8 ± 14.5     | 50.8 ± 8.7    | 53.2 ± 13.7         | 42.0 ± 8.0           | 57.8±12.7       | 52.3 ± 8.5    | 51.7 ± 14.1        | 0.80                  | .0001              | .01              |
| HR (bpm)           | 65.5 ± 10.7        | 66.3 ± 11.2     | 65.6 ± 9.9    | 67.1 ± 10.7         | 69.9 ± 10.6          | 70.7 ± 10.6     | 68.0 ± 9.8    | 72.8 ± 11.2        | .0001                 | .0001              | 0.26             |
|                    |                    |                 |               |                     |                      |                 |               |                    |                       |                    |                  |
| 24h SBP (mmHg)     | 115.6±5.5          | 117.4±5.4       | 128.9±3.3     | 131.9 ± 9.9         | 111.2±6.3            | 117.1±4.9       | 129.8±4.6     | 129.4±9.2          | .0001                 | .0001              | .01              |
| 24h DBP (mmHg)     | 71.6 ± 4.8         | 72.6 ± 4.7      | 74.7 ± 3.9    | 83.4 ± 6.5          | 70.0 ± 4.9           | 71.6 ± 4.9      | 74.2 ± 4.5    | 82.3±6.1           | .01                   | .0001              | 0.55             |
|                    |                    |                 |               |                     |                      |                 |               |                    |                       |                    |                  |
| Central SBP (mmHg) | 105.0±10.2         | 128.9±12.8      | 111.5 ± 10.1  | 125.3 ± 16.8        | 101.8±12.3           | 133.2±10.8      | 115.5±12.4    | 123.1±20.0         | 0.39                  | .0001              | .001             |
| Central ESP (mmHg) | 96.1 ± 9.6         | 117.5±10.3      | 101.3 ± 10.6  | 114.9 ± 14.7        | 93.1 ± 11.2          | 120.4 ± 9.2     | 104.4±10.8    | 112.0±16.8         | 0.97                  | .0001              | .01              |
